# Supplementary material for: Risk score for predicting mortality including urine lipoarabinomannan detection in hospital inpatients with HIV-associated tuberculosis in sub-Saharan Africa: Derivation and external validation cohort study
Source: PubMed Central journal article supplement (PMC6450614; doi:10.1371/journal.pmed.1002776), 2019-04-05
Supplement: pmed.1002776.s009.pdf [file pmed.1002776.s009.pdf]

**S1 Table. Univariable analysis of continuous variables and associations with mortality.**

|                                                      | Fitted fractional polynomial function                                               | Odds ratio (OR), 95% confidence interval   | p-value |
|------------------------------------------------------|-------------------------------------------------------------------------------------|--------------------------------------------|---------|
| <b>Age (years)<sup>a</sup></b>                       |                                                                                     |                                            |         |
| Linear                                               |                                                                                     | 1.02 (1.00 – 1.05)                         | 0.0485  |
| Age <sup>3</sup><br>Age <sup>3</sup>                 | 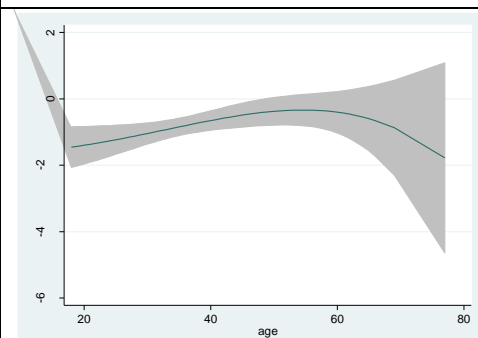   | 1.00 (1.00 – 1.00)<br>1.00 (1.00 – 1.00)   | 0.0526  |
| <b>Weight (kgs)<sup>b</sup></b>                      |                                                                                     |                                            |         |
| Linear                                               |                                                                                     | 0.98 (0.96 – 1.00)                         | 0.0486  |
| Weight <sup>-2</sup><br>Weight <sup>-2</sup>         |   | 0<br>0                                     | 0.0897  |
| <b>CD4 count<sup>c</sup></b>                         |                                                                                     |                                            |         |
| Linear                                               |                                                                                     | 1.00 (1.00 – 1.00)                         | 0.0158  |
| CD4 count <sup>-2</sup><br>CD4 count                 |  | 16.7 (0.65 – 430.71)<br>1.00 (1.00 – 1.00) | 0.0055  |
| <b>Haemoglobin (g/L)<sup>d</sup></b>                 |                                                                                     |                                            |         |
| Linear                                               |                                                                                     | 0.98 (0.97 – 0.99)                         | 0.0002  |
| Haemoglobin <sup>3</sup><br>Haemoglobin <sup>3</sup> |  | 1.00 (1.00 – 1.00)<br>1.00 (1.00 – 1.00)   | 0.0001  |

<sup>a</sup> This function has a small increase to 55 years, then a steeper increase

<sup>b</sup> This gives a “U-shaped” function and has an increase until 35kg, then a sharper decrease until 60kg, and then a less steep increase

<sup>c</sup> This function has a sharp peak in the low values (<20 cell/microL), followed by a linear decrease

<sup>d</sup> This is a “U-shaped” function and has a decrease until about 150 g/L, followed by an increase.
