# Supplementary material for: Risk score for predicting mortality including urine lipoarabinomannan detection in hospital inpatients with HIV-associated tuberculosis in sub-Saharan Africa: Derivation and external validation cohort study
Source: PubMed Central journal article supplement (PMC6450614; doi:10.1371/journal.pmed.1002776), 2019-04-05
Supplement: pmed.1002776.s010.pdf [file pmed.1002776.s010.pdf]

## S2 Table. Risk score and mortality data

Number of survivors, patients dying, observed and predicted mortality risk for **A)** 'full' mortality predictor score (based on the regression coefficients) and **B)** simplified mortality risk score.

**A)**

| Risk score category | Proportion of patients | Survived | Died | Observed mortality | Predicted Mortality |
|---------------------|------------------------|----------|------|--------------------|---------------------|
| <b>0-5</b>          | 1.3                    | 4        | 0    | 0.0                | 7.7                 |
| <b>6-10</b>         | 14.0                   | 38       | 6    | 13.6               | 12.1                |
| <b>11-15</b>        | 27.3                   | 68       | 18   | 20.9               | 18.4                |
| <b>16-20</b>        | 17.8                   | 44       | 12   | 21.4               | 27.0                |
| <b>21-25</b>        | 17.8                   | 36       | 20   | 35.7               | 37.8                |
| <b>26-30</b>        | 17.8                   | 27       | 29   | 51.8               | 49.9                |
| <b>31-35</b>        | 3.2                    | 3        | 7    | 70.0               | 62.0                |
| <b>&gt;35</b>       | 1.0                    | 1        | 2    | 66.7               | 72.8                |
| <b>Low</b>          | 15.2                   | 42       | 6    | 12.5               | 9.7                 |
| <b>Medium</b>       | 45.1                   | 112      | 30   | 21.1               | 23.0                |
| <b>High</b>         | 39.7                   | 67       | 58   | 46.4               | 45.3                |

Mortality risk groups were defined as low risk (10 points or fewer), medium risk (11 to 20 points) or high risk (more than 20 points)

**B)**

| Risk score or risk score category | % of patients | Survived | Died | Observed mortality | Predicted Mortality |
|-----------------------------------|---------------|----------|------|--------------------|---------------------|
| <b>0</b>                          | 1.3           | 4        | 0    | 0.0                | 5.6                 |
| <b>1</b>                          | 14.0          | 38       | 6    | 13.6               | 10.7                |
| <b>2</b>                          | 29.2          | 74       | 18   | 19.6               | 19.5                |
| <b>3</b>                          | 33.7          | 74       | 32   | 30.2               | 32.7                |
| <b>4</b>                          | 17.8          | 27       | 29   | 51.8               | 49.5                |
| <b>5</b>                          | 3.8           | 4        | 8    | 66.7               | 66.3                |
| <b>6</b>                          | 0.3           | 0        | 1    | 100.0              | 79.9                |
| <b>Low</b>                        | 15.2          | 42       | 6    | 12.5               | 10.5                |
| <b>Medium</b>                     | 29.2          | 74       | 18   | 19.6               | 21.7                |
| <b>High</b>                       | 55.6          | 105      | 70   | 40.0               | 39.5                |

Mortality risk groups were defined as low risk (1 point or fewer), medium risk (2 points) or high risk (more than 2 points)
