# Supplementary material for: Risk score for predicting mortality including urine lipoarabinomannan detection in hospital inpatients with HIV-associated tuberculosis in sub-Saharan Africa: Derivation and external validation cohort study
Source: PubMed Central journal article supplement (PMC6450614; doi:10.1371/journal.pmed.1002776), 2019-04-05
Supplement: pmed.1002776.s011.pdf [file pmed.1002776.s011.pdf]

**S3 Table. C-statistic, 95% confidence intervals and Hosmer-Lemshow test for final model and risk scores in derivation and validation cohorts.**

| <b>Cohort/model</b>            | <b>C-statistic</b> | <b>95% Conf. Interval</b> | <b>Hosmer-Lemshow test p-value</b> |
|--------------------------------|--------------------|---------------------------|------------------------------------|
| Derivation cohort full model   | 0.7299             | 0.66957 - 0.79015         | 0.4527                             |
| Derivation cohort full score   | 0.6968             | 0.63280 - 0.76077         | 0.7813                             |
| Derivation cohort simple score | 0.6471             | 0.59337 - 0.70092         | 0.4956                             |
| Validation cohort full model   | 0.6659             | 0.60062 - 0.73123         | 0.2334                             |
| Validation cohort full score   | 0.6770             | 0.61307 - 0.74083         | 0.1315                             |
| Validation cohort simple score | 0.6605             | 0.59756 - 0.72336         | 0.2269                             |
