# Supplementary material for: Risk score for predicting mortality including urine lipoarabinomannan detection in hospital inpatients with HIV-associated tuberculosis in sub-Saharan Africa: Derivation and external validation cohort study
Source: PLoS Med. 2019 Apr 5;16(4):e1002776. doi: 10.1371/journal.pmed.1002776 (PMC6450614; doi:10.1371/journal.pmed.1002776)
Supplement: S2 Appendix — (PDF) [file pmed.1002776.s002.pdf]

| Section/Topic                | Item | Checklist Item                                                                                                                                                                                       | Page                                                                                                                                                                                                                                                                                                                                                                            |
|------------------------------|------|------------------------------------------------------------------------------------------------------------------------------------------------------------------------------------------------------|---------------------------------------------------------------------------------------------------------------------------------------------------------------------------------------------------------------------------------------------------------------------------------------------------------------------------------------------------------------------------------|
| <b>Title and abstract</b>    |      |                                                                                                                                                                                                      |                                                                                                                                                                                                                                                                                                                                                                                 |
| Title                        | 1    | D;V Identify the study as developing and/or validating a multivariable prediction model, the target population, and the outcome to be predicted.                                                     | Title                                                                                                                                                                                                                                                                                                                                                                           |
| Abstract                     | 2    | D;V Provide a summary of objectives, study design, setting, participants, sample size, predictors, outcome, statistical analysis, results, and conclusions.                                          | Abstract                                                                                                                                                                                                                                                                                                                                                                        |
| <b>Introduction</b>          |      |                                                                                                                                                                                                      |                                                                                                                                                                                                                                                                                                                                                                                 |
| Background and objectives    | 3a   | D;V Explain the medical context (including whether diagnostic or prognostic) and rationale for developing or validating the multivariable prediction model, including references to existing models. | Introduction, paragraphs 1-4                                                                                                                                                                                                                                                                                                                                                    |
|                              | 3b   | D;V Specify the objectives, including whether the study describes the development or validation of the model or both.                                                                                | Introduction, paragraph 4<br><br>"We therefore aimed to investigate if urinary LAM detection, along with other clinical variables readily available in high-burden settings, could be used to predict which HIV-positive patients admitted to hospital and diagnosed with TB patients were at high risk of early mortality in, and to externally validate the predictive tool." |
| <b>Methods</b>               |      |                                                                                                                                                                                                      |                                                                                                                                                                                                                                                                                                                                                                                 |
| Source of data               | 4a   | D;V Describe the study design or source of data (e.g., randomized trial, cohort, or registry data), separately for the development and validation data sets, if applicable.                          | Methods, paragraph 1 (development), paragraph 10 (validation)                                                                                                                                                                                                                                                                                                                   |
|                              | 4b   | D;V Specify the key study dates, including start of accrual; end of accrual; and, if applicable, end of follow-up.                                                                                   | Methods, paragraph 1 (October 2015 and September 2017) and Methods, paragraph 11 (LAM-RCT recruitment occurred between January 2013 and October 2014, and the MSF cohort between October 2013 and August 2015.)                                                                                                                                                                 |
| Participants                 | 5a   | D;V Specify key elements of the study setting (e.g., primary care, secondary care, general population) including number and location of centres.                                                     | Methods, paragraph 1 (hospital cohort)                                                                                                                                                                                                                                                                                                                                          |
|                              | 5b   | D;V Describe eligibility criteria for participants.                                                                                                                                                  | Methods, paragraph 2                                                                                                                                                                                                                                                                                                                                                            |
|                              | 5c   | D;V Give details of treatments received, if relevant.                                                                                                                                                | Methods, paragraph 3                                                                                                                                                                                                                                                                                                                                                            |
| Outcome                      | 6a   | D;V Clearly define the outcome that is predicted by the prediction model, including how and when assessed.                                                                                           | Methods, paragraph 3 "The outcome was early mortality risk at 2-months after admission"                                                                                                                                                                                                                                                                                         |
|                              | 6b   | D;V Report any actions to blind assessment of the outcome to be predicted.                                                                                                                           | NA                                                                                                                                                                                                                                                                                                                                                                              |
| Predictors                   | 7a   | D;V Clearly define all predictors used in developing or validating the multivariable prediction model, including how and when they were measured.                                                    | Methods, paragraph 4-5                                                                                                                                                                                                                                                                                                                                                          |
|                              | 7b   | D;V Report any actions to blind assessment of predictors for the outcome and other predictors.                                                                                                       | Methods, paragraph 2-3 Predictors all assessed prior to outcome occurring                                                                                                                                                                                                                                                                                                       |
| Sample size                  | 8    | D;V Explain how the study size was arrived at.                                                                                                                                                       | Methods, paragraph 3- Convenience sample size                                                                                                                                                                                                                                                                                                                                   |
| Missing data                 | 9    | D;V Describe how missing data were handled (e.g., complete-case analysis, single imputation, multiple imputation) with details of any imputation method.                                             | Methods, paragraph 6 & 12                                                                                                                                                                                                                                                                                                                                                       |
| Statistical analysis methods | 10a  | D Describe how predictors were handled in the analyses.                                                                                                                                              | Methods, paragraph 6-7                                                                                                                                                                                                                                                                                                                                                          |
|                              | 10b  | D Specify type of model, all model-building procedures (including any predictor selection), and method for internal validation.                                                                      | Methods, paragraph 6-7                                                                                                                                                                                                                                                                                                                                                          |
|                              | 10c  | V For validation, describe how the predictions were calculated.                                                                                                                                      | Methods, paragraph 12                                                                                                                                                                                                                                                                                                                                                           |

|                            |     |     |                                                                                                                                                                                                       |                                                                                                                                                                                                                                                                                 |
|----------------------------|-----|-----|-------------------------------------------------------------------------------------------------------------------------------------------------------------------------------------------------------|---------------------------------------------------------------------------------------------------------------------------------------------------------------------------------------------------------------------------------------------------------------------------------|
|                            | 10d | D;V | Specify all measures used to assess model performance and, if relevant, to compare multiple models.                                                                                                   | Methods, paragraph 8-9, 13                                                                                                                                                                                                                                                      |
|                            | 10e | V   | Describe any model updating (e.g., recalibration) arising from the validation, if done.                                                                                                               | None done                                                                                                                                                                                                                                                                       |
| Risk groups                | 11  | D;V | Provide details on how risk groups were created, if done.                                                                                                                                             | Methods, paragraph 7 "High-, medium- and low-risk groups for mortality were then arbitrarily defined after plotting risk score against observed mortality, so the high-risk group accounted for most (>50%) deaths, and low-risk group accounted for as few deaths as possible" |
| Development vs. validation | 12  | V   | For validation, identify any differences from the development data in setting, eligibility criteria, outcome, and predictors.                                                                         | Methods, paragraph 11                                                                                                                                                                                                                                                           |
| <b>Results</b>             |     |     |                                                                                                                                                                                                       |                                                                                                                                                                                                                                                                                 |
| Participants               | 13a | D;V | Describe the flow of participants through the study, including the number of participants with and without the outcome and, if applicable, a summary of the follow-up time. A diagram may be helpful. | Results, paragraph 1; Figure 1                                                                                                                                                                                                                                                  |
|                            | 13b | D;V | Describe the characteristics of the participants (basic demographics, clinical features, available predictors), including the number of participants with missing data for predictors and outcome.    | Results, paragraph 1; Table 1                                                                                                                                                                                                                                                   |
|                            | 13c | V   | For validation, show a comparison with the development data of the distribution of important variables (demographics, predictors and outcome).                                                        | Table 1, Figure 4                                                                                                                                                                                                                                                               |
| Model development          | 14a | D   | Specify the number of participants and outcome events in each analysis.                                                                                                                               | Results, paragraph 1; Figure 1                                                                                                                                                                                                                                                  |
|                            | 14b | D   | If done, report the unadjusted association between each candidate predictor and outcome.                                                                                                              | Table 2                                                                                                                                                                                                                                                                         |
| Model specification        | 15a | D   | Present the full prediction model to allow predictions for individuals (i.e., all regression coefficients, and model intercept or baseline survival at a given time point).                           | Table 2                                                                                                                                                                                                                                                                         |
|                            | 15b | D   | Explain how to use the prediction model.                                                                                                                                                              | Results, paragraph 4-6;                                                                                                                                                                                                                                                         |
| Model performance          | 16  | D;V | Report performance measures (with CIs) for the prediction model.                                                                                                                                      | Figures 3 & 4; Results, paragraph 4, 6, 8-9                                                                                                                                                                                                                                     |
| Model-updating             | 17  | V   | If done, report the results from any model updating (i.e., model specification, model performance).                                                                                                   | NA                                                                                                                                                                                                                                                                              |
| <b>Discussion</b>          |     |     |                                                                                                                                                                                                       |                                                                                                                                                                                                                                                                                 |
| Limitations                | 18  | D;V | Discuss any limitations of the study (such as nonrepresentative sample, few events per predictor, missing data).                                                                                      | Discussion, paragraphs 9-10                                                                                                                                                                                                                                                     |
| Interpretation             | 19a | V   | For validation, discuss the results with reference to performance in the development data, and any other validation data.                                                                             | Discussion, paragraph 11                                                                                                                                                                                                                                                        |
|                            | 19b | D;V | Give an overall interpretation of the results, considering objectives, limitations, results from similar studies, and other relevant evidence.                                                        | Discussion, paragraphs 1-6                                                                                                                                                                                                                                                      |
| Implications               | 20  | D;V | Discuss the potential clinical use of the model and implications for future research.                                                                                                                 | Discussion, paragraphs 5-6                                                                                                                                                                                                                                                      |
| <b>Other information</b>   |     |     |                                                                                                                                                                                                       |                                                                                                                                                                                                                                                                                 |
| Supplementary information  | 21  | D;V | Provide information about the availability of supplementary resources, such as study protocol, Web calculator, and data sets.                                                                         | Data statement, supplement                                                                                                                                                                                                                                                      |
| Funding                    | 22  | D;V | Give the source of funding and the role of the funders for the present study.                                                                                                                         | Financial Disclosure Statement                                                                                                                                                                                                                                                  |

\*Items relevant only to the development of a prediction model are denoted by D, items relating solely to a validation of a prediction model are denoted by V, and items relating to both are denoted D;V.

We recommend using the TRIPOD Checklist in conjunction with the TRIPOD Explanation and Elaboration document.
